# Supplementary material for: BnERF114.A1, a Rapeseed Gene Encoding APETALA2/ETHYLENE RESPONSE FACTOR, Regulates Plant Architecture through Auxin Accumulation in the Apex in Arabidopsis
Source: MDPI journal article supplement (doi:10.3390/ijms23042210), 2022-02-17
Supplement: s1 [file s1]

**Table S1. Primers used in this study.**

| Primer Name    | Primer Sequence (5'-3')                   | Purpose                  |
|----------------|-------------------------------------------|--------------------------|
| BnERF114.A1-F  | <u>ATGGATCCT</u> CGATACAATGGGAA           | CDS cloning              |
| BnERF114.A1-R  | <u>ACTAGTATA</u> ACCCGAATGTGGAGAGGAAG     |                          |
| 114pro-F       | <u>GGAATTC</u> ATTTAGCCGTTGCAGCATTT       | Gus analysis             |
| 114pro-R       | <u>CGGATCC</u> ATTTTGCTAGATTTGATTAAAGTCC  |                          |
| 114SL-F        | CT <u>GAAATTC</u> ATGGATCCTCGATACAATGGGAA | Subcellular localization |
| 114SL-R        | CTG <u>ACTAGTATA</u> ACCCGAATGTGGAGAGGAAG |                          |
| E756-F         | <u>CATATG</u> ATGGATCCTCGATACAATGGGAA     | Transcription activity   |
| E756-R         | <u>GAATTC</u> CTAATAACCCGAATGTGGAGAGGAAG  |                          |
| E246-F         | <u>CATATG</u> ATGGATCCTCGATACAATGGG       | Transcription activity   |
| E246-R         | <u>GAATTC</u> CTATCTCGTCCTCAAGTTCCTTG     |                          |
| E177-F         | <u>CATATG</u> CATTATAGAGGGGTAAGGCAAAG     | Transcription activity   |
| E177-R         | <u>GAATTC</u> CTATTTCAGGGAAGTTGAGTTTGGC   |                          |
| E333-F         | <u>CATATG</u> AGGGTTCAGCTAGGAAGCAATAT     | Transcription activity   |
| E333-R         | <u>GAATTC</u> CTAATAACCCGAATGTGGAGAGGA    |                          |
| BnUBC21-qF     | CCTCTGCAGCCTCCTCAAGT                      | Reference gene           |
| BnUBC21-qR     | CATATCTCCCCTGTCTTGAAATGC                  |                          |
| BnERF114.C2-qF | CCTTTGGAGGCGAGGAAAATGAA                   | Expression level         |
| BnERF114.C2-qR | CGTGAGAGCTGCCTTGTTGGTTA                   |                          |
| BnERF114.A1-qF | AAGATGAGAACTTATTCCTGTGTC                  | Expression level         |
| BnERF114.A1-qR | TTGACTAGGGTCTTGTGGATT                     |                          |
| BnERF114.A6-qF | GAAATGGGCAGCTGAAATACGG                    | Expression level         |
| BnERF114.A6-qR | GATAACTGATCATTATAGGCAACG                  |                          |
| BnERF114.C3-qF | CAAGATCAAGGAACTCGATGG                     | Expression level         |
| BnERF114.C3-qR | GGTAGAGTTTGATAGCTGATCATTAC                |                          |
| AtUBC21-qF     | CTGCGACTCAGGGAATCTTCTAA                   | Reference gene           |
| AtUBC21-qR     | TTGTGCCATTGAATTGAACCC                     |                          |
| AUX1-qF        | GCACTTCTCGACCACTCC                        | Expression level         |
| AUX1-qR        | TCCCAATCACTTTCTCCC                        |                          |
| LAX1-qF        | GCTGTGACCGTGGAATA                         | Expression level         |
| LAX1-qR        | ACGGAAGCGTTAATGTGA                        |                          |
| LAX2-qF        | ATTGTTGGATTCGGGTTCG                       | Expression level         |
| LAX2-qR        | GGTGGTGGGCATTGGTAG                        |                          |

|           |                         |                  |
|-----------|-------------------------|------------------|
| LAX3-qF   | TGCTTACCTTTGCTCCTG      | Expression level |
| LAX3-qR   | AACCCAACTACGAATACCC     |                  |
| PGP1-qF   | TGGCTGCTCTTTACCTCTGT    | Expression level |
| PGP1-qR   | CTCCACATCCAACACGAAAT    |                  |
| PGP2-qF   | ATCGCACGCTAAGCAGAC      | Expression level |
| PGP2-qR   | ACGCCATACATCCAGTCC      |                  |
| PGP4-qF   | AGACAAGCAGCGAGAATA      | Expression level |
| PGP4-qR   | CTATCACAAAGCCTCCTAC     |                  |
| PGP19-qF  | CTTGTGAGTAAAGGCGTGTC    | Expression level |
| PGP19-qR  | GGGTCAATCCTGGTCTGC      |                  |
| PIN1-qF   | ACGGCTCTGTCAAATGGT      | Expression level |
| PIN1-qR   | TGTTAGCGGCGATGAAGT      |                  |
| PIN2-qF   | TCACTATCAAACTGCCTAA     | Expression level |
| PIN2-qR   | CACGGAAC TCAAACAAGA     |                  |
| PIN3-qF   | GGCTGCTTCCATTGTTTC      | Expression level |
| PIN3-qR   | TTCCCGTCGTCACCTATC      |                  |
| PIN4-qF   | CTTGTGGGAACTCTGTGCG     | Expression level |
| PIN4-qR   | AGTGCTTAGAATCGTGGG      |                  |
| PIN5-qF   | TATGGCTCTGTGAAATGG      | Expression level |
| PIN5-qR   | AAGACCGTGACTATGATGAC    |                  |
| PIN6-qF   | TCCGTCAAACTCCTAATAAC    | Expression level |
| PIN6-qR   | ATCCGAACCCGCCTAAAT      |                  |
| PIN7-qF   | CACAGCAGAGCTAAACCCTA    | Expression level |
| PIN7-qR   | TCCCACCTGAAAGCAACA      |                  |
| PIN8-qF   | ATCCAAATACATACGCAACA    | Expression level |
| PIN8-qR   | ATTCCTAAGCCTCCATCA      |                  |
| YUCCA1-qF | CGGTCGGATTCAATAGCATCTC  | Expression level |
| YUCCA1-qR | AAGCGTAGGACTCAAGGTAGG   |                  |
| YUCCA2-qF | GGATGAGACAATGGAGTATG    | Expression level |
| YUCCA2-qR | ATATTTCACCGCTCTTATAGG   |                  |
| YUCCA4-qF | ACGCATCTGGTCTATGGAATG   | Expression level |
| YUCCA4-qR | CGGACTTGTACGCACTGG      |                  |
| YUCCA6-qF | GGTTGAGTCGGCTGCGTTTG    | Expression level |
| YUCCA6-qR | ACATACTCCGTCGTGCCTTCTTC |                  |
