# Supplementary material for: BnERF114.A1, a Rapeseed Gene Encoding APETALA2/ETHYLENE RESPONSE FACTOR, Regulates Plant Architecture through Auxin Accumulation in the Apex in Arabidopsis
Source: MDPI journal article supplement (doi:10.3390/ijms23042210), 2022-02-17
Supplement: s1 [file s1]

**Table S2. Amino acid alignment of AtERF114 and its orthologues ERF114s in *B. napus*, *B. rapa*, and *B. oleracea*.**

| Protein Name | Protein ID     | Identity with AtERF114 | Query Coverage | E-Value |
|--------------|----------------|------------------------|----------------|---------|
| BnERF114.A1  | XP_013727956.1 | 76%                    | 99%            | 2e-114  |
| BnERF114.C2  | XP_013675388.1 | 77%                    | 99%            | 2e-110  |
| BnERF114.A6  | XP_013645692.1 | 74%                    | 97%            | 9e-91   |
| BnERF114.C3  | XP_013718191.1 | 71%                    | 97%            | 5e-91   |
| BrERF114.A2  | XP_009130180.1 | 77%                    | 99%            | 2e-110  |
| BrERF114.A6  | XP_018515123.1 | 73%                    | 99%            | 4e-91   |
| BoERF114.C2  | XP_013626888.1 | 71%                    | 97%            | 2e-89   |
| BoERF114.C6  | XP_013619319.1 | 79%                    | 99%            | 5e-113  |

NB: BnERF114.A1, BnERF114.C2, BnERF114.A6, and BnERF114.C3 are ERF114 proteins in *B. napus*; BrERF114.A2 and BrERF114.A6 are ERF114 proteins in *B. rapa*; BoERF114.C2 and BoERF114.C6 are ERF114 proteins in *B. oleracea*.
